# Supplementary material for: Preparation and Size Control of Efficient and Safe Nanopesticides by Anodic Aluminum Oxide Templates-Assisted Method
Source: MDPI journal article supplement (doi:10.3390/ijms22158348), 2021-08-03
Supplement: s1 [file s1]

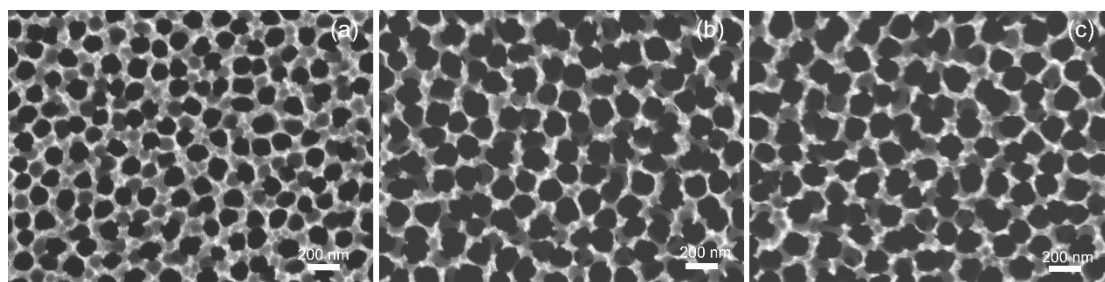

**Figure S1.** The SEM images of AAO templates after immersing in methanol, tetrahydrofuran and acetone.

(a) SEM image of AAO templates in methanol, (b) SEM image of AAO templates in tetrahydrofuran, (c) SEM image of AAO templates in acetone.

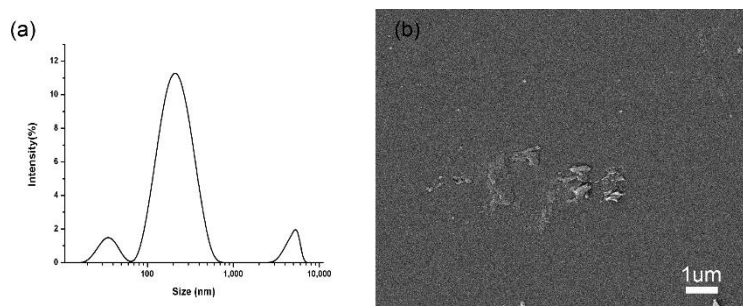

**Figure S2.** The DLS and SEM image of the bupropion particles (BPs) using reprecipitation

(a) DLS image of BPs, (b) SEM image of BPs

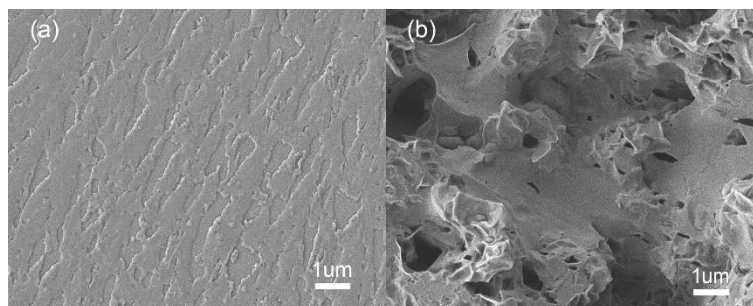

**Figure S3.** The SEM image of the AAO templates without drugs under alkaline condition and acidic condition

(a) SEM image of AAO templates in 0.1 mol/L NaOH solution (b) SEM image of AAO templates in 1 mol/L hydrochloric acid solution

Table S1. The comparison between AAO template method and reprecipitation methods

| Characterization            | AAO template method | Reprecipitation method |
|-----------------------------|---------------------|------------------------|
| Particle size               | Controllable        | Uncontrollable         |
| Uniformity                  | Monodispersity      | Polydispersity         |
| Dispersibility              | Uniform dispersion  | Uneven dispersion      |
| Applicability for pesticide | High                | General                |
